# Supplementary material for: Cathelicidin-related antimicrobial peptide protects against myocardial ischemia/reperfusion injury
Source: Springer Nature journal article supplement (doi:10.1186/s12916-019-1268-y), 2019-02-20

# Supplementary Figure 4

**a**

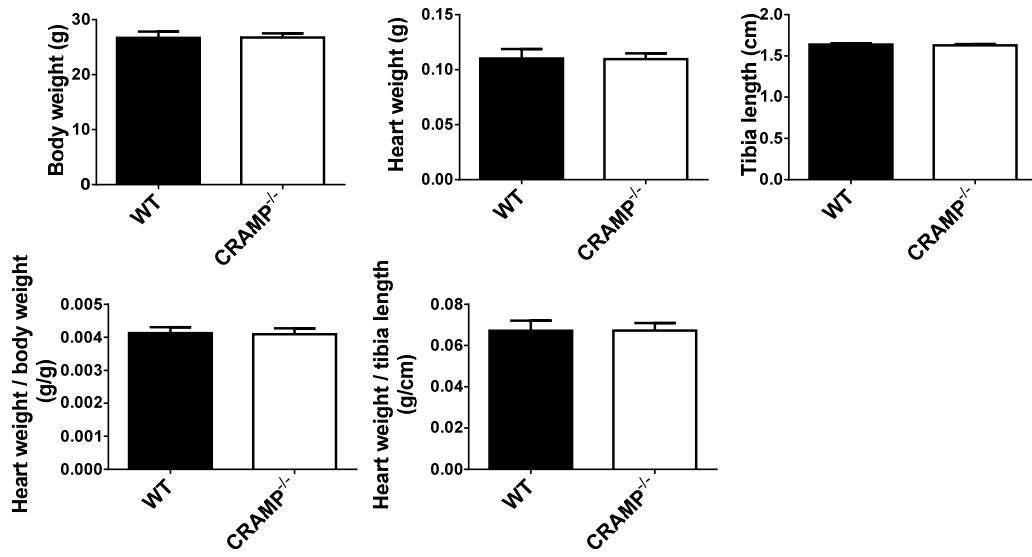

**b**

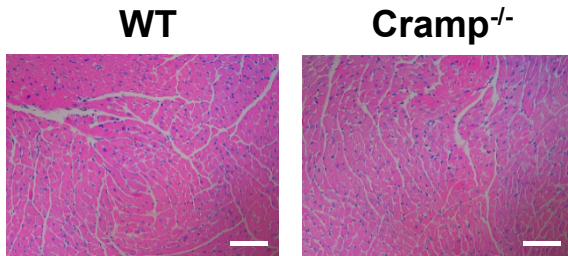

**c**

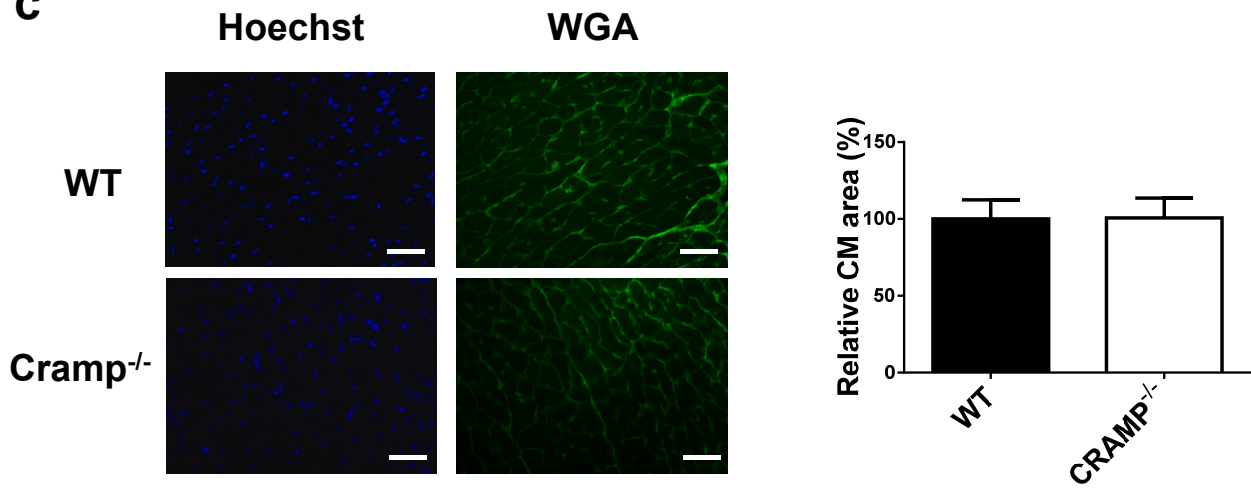

**d**

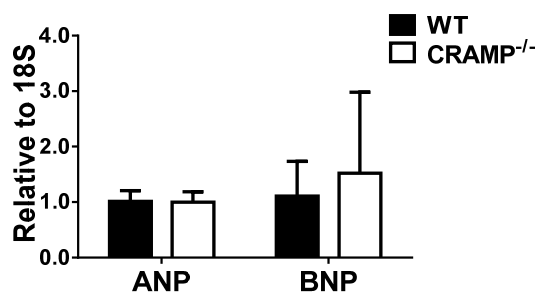

Supplement: MOESM4 [file 16495190]
