# Supplementary material for: Cathelicidin-related antimicrobial peptide protects against myocardial ischemia/reperfusion injury
Source: Springer Nature journal article supplement (doi:10.1186/s12916-019-1268-y), 2019-02-20

## Supplementary Figure 5

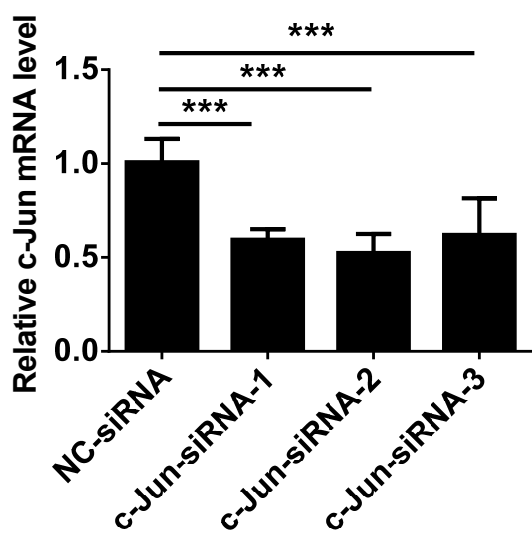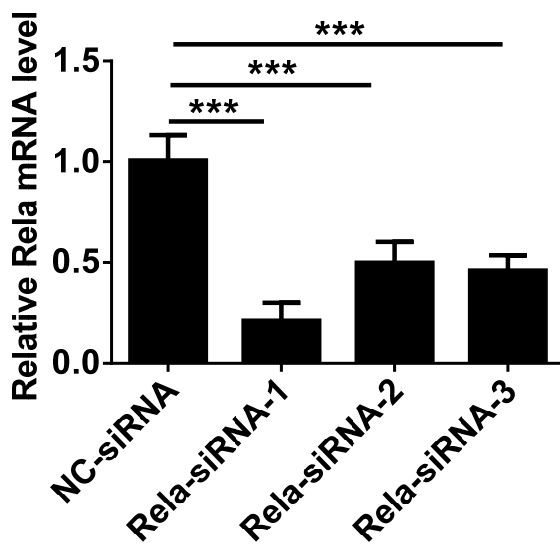

Supplement: MOESM5 [file 16495190]
